# Supplementary material for: Observational operator for fair model evaluation with ground NO 2 measurements
Source: Copernicus journal article supplement (doi:10.5194/gmd-17-8267-2024), 2024-11-25
Supplement: Supplementary file 1 [file gmd-17-8267-2024-supplement.pdf]

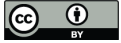

*Supplement of*

## **Observational operator for fair model evaluation with ground NO<sub>2</sub> measurements**

**Li Fang et al.**

*Correspondence to:* Jianbing Jin ([jianbing.jin@nuist.edu.cn](mailto:jianbing.jin@nuist.edu.cn)) and Hong Liao ([hongliao@nuist.edu.cn](mailto:hongliao@nuist.edu.cn))

The copyright of individual parts of the supplement might differ from the article licence.

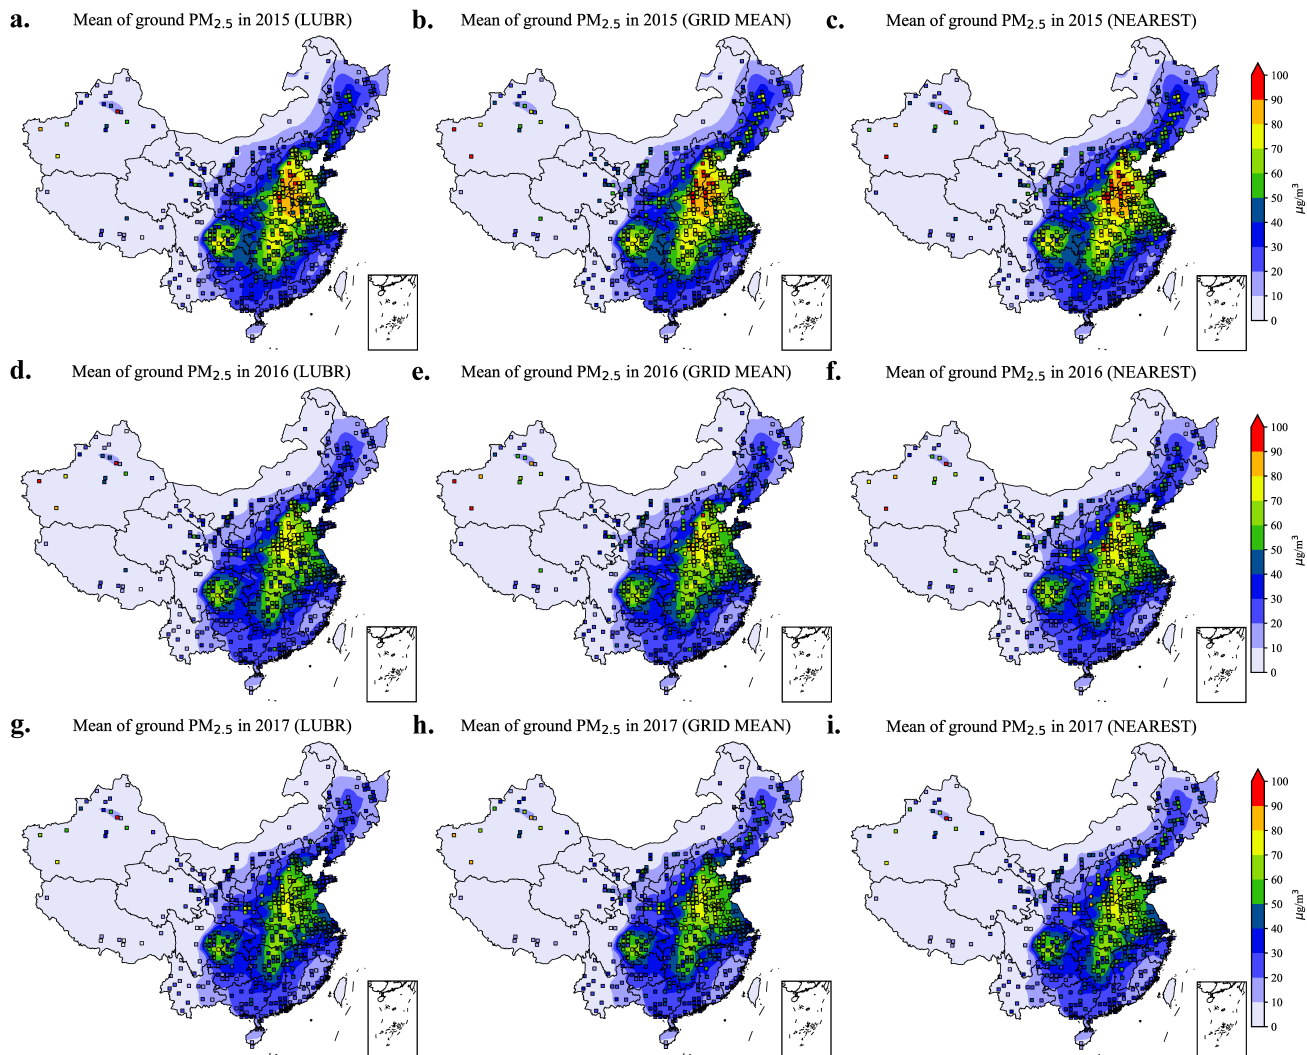

**Figure S1.** The annual averaged ground PM<sub>2.5</sub> from GEOS-Chem simulations (filled contours) and the represented observations of simulation grids (colored squares) from three methods. Panels a, d, and g present results using the LUBR method to represent grid PM<sub>2.5</sub> concentrations for 2015, 2016, and 2017, respectively. Panels b, e, and h present results using the grid mean method. Panels c, f, and i present results using the nearest search method.

### S1 Formula of the statistic matrices

$$\text{RMSE} = \sqrt{\frac{1}{n} \sum_{i=1}^n (y_i - \hat{y}_i)^2}, \quad (\text{S1})$$

$$\text{MAE} = \frac{1}{n} \sum_{i=1}^n |y_i - \hat{y}_i|, \quad (\text{S2})$$

$$\text{NMB} = \frac{\sum_{i=1}^n (y_i - \hat{y}_i)}{\sum_{i=1}^n \hat{y}_i} \times 100\%, \quad (\text{S3})$$

$$R^2 = 1 - \frac{\sum_{i=1}^n (y_i - \hat{y}_i)^2}{\sum_{i=1}^n (y_i - \bar{y})^2}, \quad (\text{S4})$$

where  $n$  represents the size of the dataset,  $\hat{y}_i$  and  $y_i$  denote the predicted values of GEOS-Chem and true observations, respectively, and  $\bar{y}$  represents the mean of the observed values.

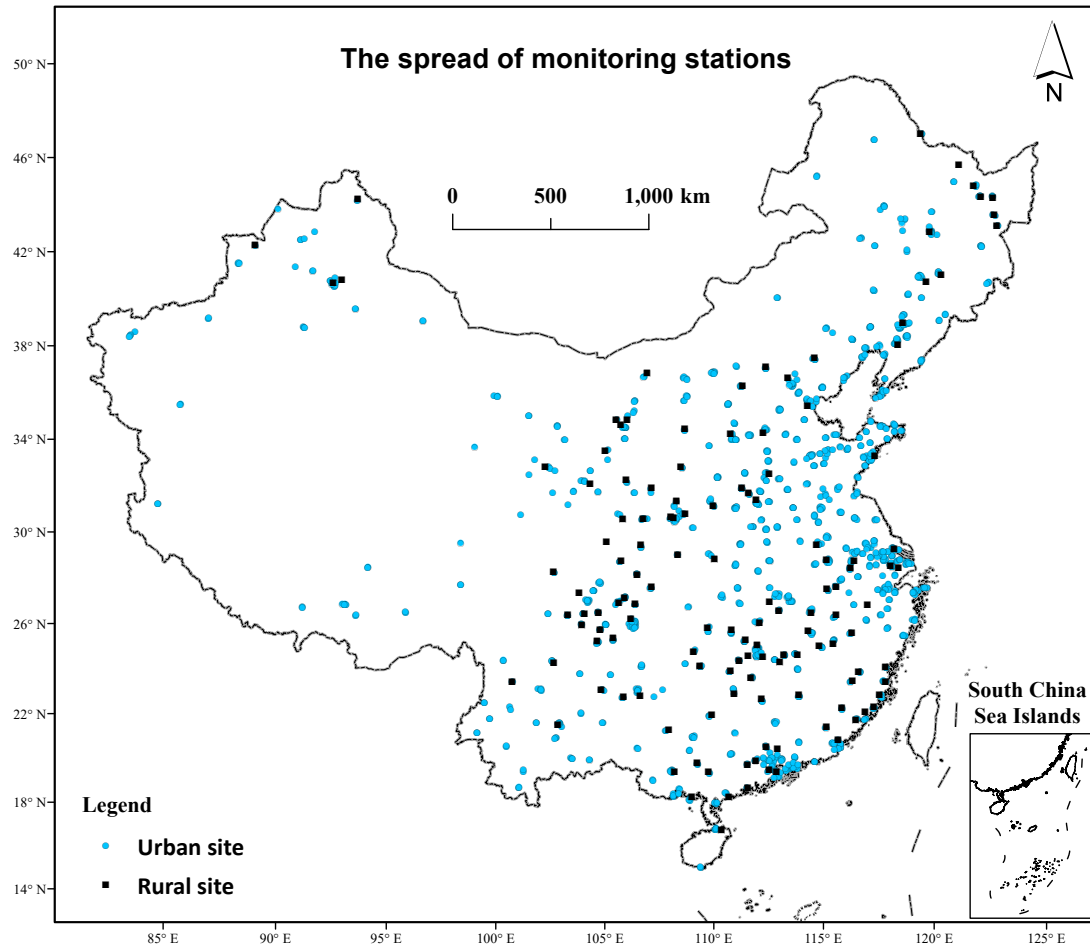

**Figure S2.** The spread of air quality monitoring stations in the study area. The turquoise dots and black squares represent urban sites and rural sites, respectively.

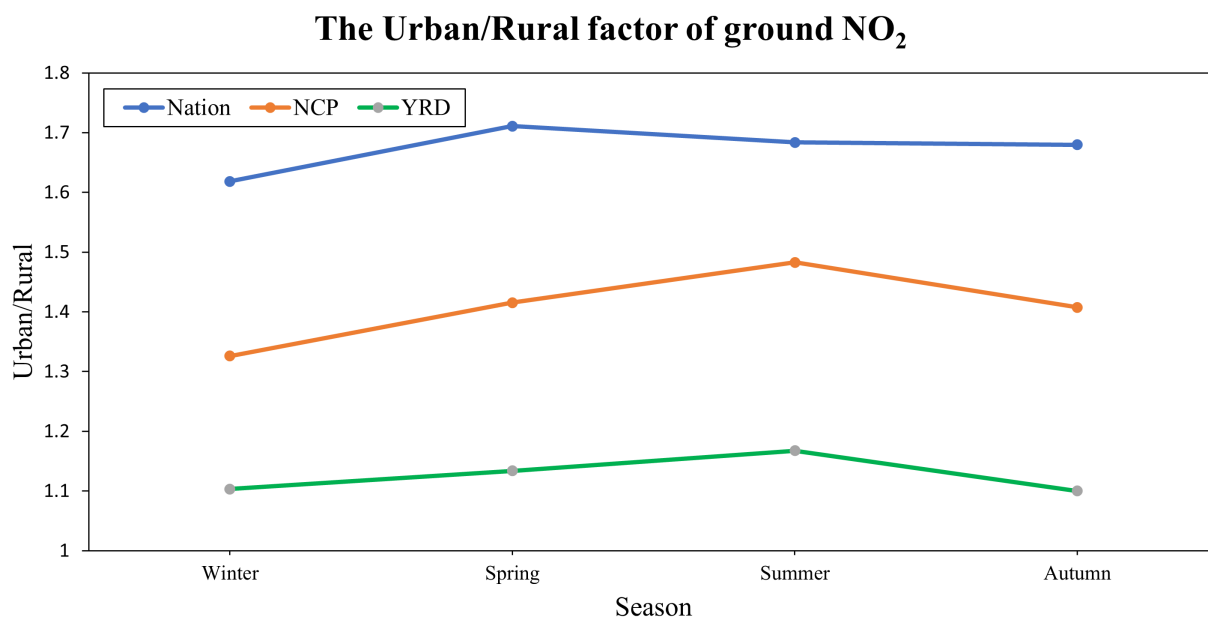

**Figure S3.** The seasonal Urban/rural factors of ground NO<sub>2</sub>. Each season is calculated from the average of 2015-2017 data. The blue dots correspond to the national scale, while the orange and green dots represent the NCP and YRD regions, respectively.

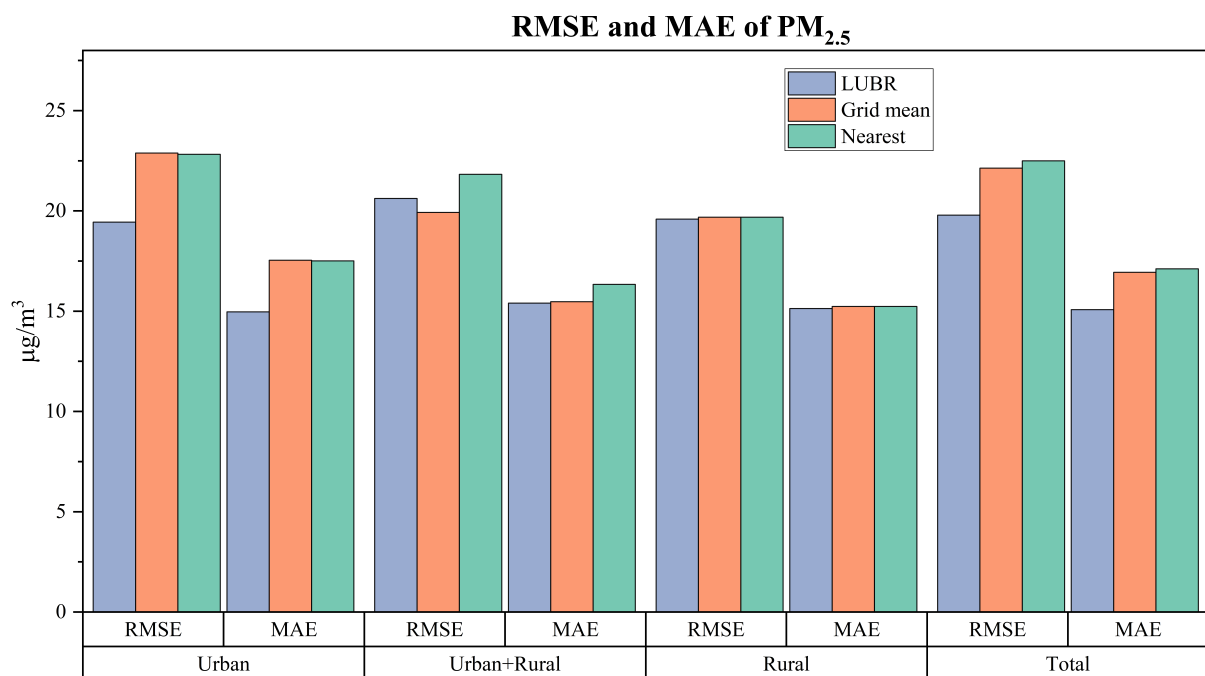

**Figure S4.** The comprehensive statistical results, encompassing RMSE and MAE, demonstrate the performance of the gridded PM<sub>2.5</sub> observations compared to the GEOS-Chem simulations. The colors ice blue, rosy red, and cyan represent the LUBR, nearest search, and grid mean methods, respectively. 'Urban,' 'Urban+Rural,' and 'Rural' categorize grids based on the presence of urban and rural sites. 'Urban' includes grids with exclusively urban sites, 'Urban+Rural' includes both urban and rural sites, and 'Rural' comprises grids with only rural sites. 'Total' aggregates results by calculating the average across all three categories.

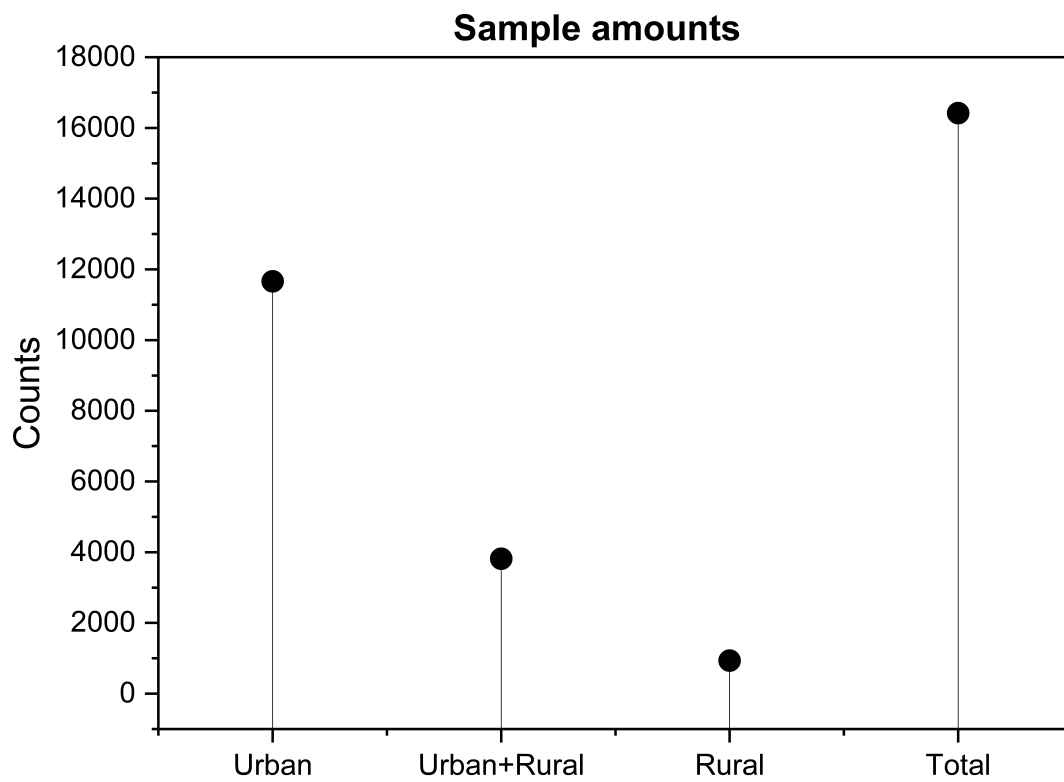

**Figure S5.** The sample amounts of the categorized grids of 'Urban,' 'Urban+Rural,' 'Rural,' and 'Total'.
